# Supplementary material for: Effectiveness of Non-Pharmacological Interventions for Overweight or Obese Infertile Women: A Systematic Review and Meta-Analysis
Source: MDPI journal article supplement (doi:10.3390/ijerph17207438), 2020-10-13
Supplement: s1 [file s1]

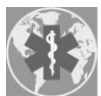

1 **Supplementary File S1:** Search Strategy on Ovid MEDLINE.

2 **Table S1.** Search strategy in Ovid MEDLINE.

| SET | Ovid MEDLINE (Results)                                           |
|-----|------------------------------------------------------------------|
| 1   | exp Embryo Transfer/ (15545)                                     |
| 2   | exp Reproductive Techniques/ (145200)                            |
| 3   | exp Fertilization in Vitro/ (34533)                              |
| 4   | exp Infertility/ (63911)                                         |
| 5   | exp Insemination, Artificial/ (11471)                            |
| 6   | exp Ovulation Induction/ (12756)                                 |
| 7   | exp Sperm Injections, Intracytoplasmic/ (6320)                   |
| 8   | anovulation\$.ab,ti. (2650)                                      |
| 9   | artificial insemination\$.ab,ti. (6452)                          |
| 10  | assisted reproduct\$.ab,ti. (13979)                              |
| 11  | (asthenozoospermia or oligospermia or azoospermia).ab,ti. (7260) |
| 12  | childless\$.ab,ti. (1777)                                        |
| 13  | COH.ab,ti. (1651)                                                |
| 14  | (desire adj3 child\$).ab,ti. (1294)                              |
| 15  | Embryo Transfer\$.ab,ti. (11368)                                 |
| 16  | fecund\$.ab,ti. (12731)                                          |
| 17  | fertil\$.ab,ti. (161212)                                         |
| 18  | ICSI.ab,ti. (7935)                                               |
| 19  | in vitro fertili?ation.ab,ti. (22128)                            |
| 20  | infecundit\$.ab,ti. (53)                                         |
| 21  | infertil\$.ab,ti. (57571)                                        |
| 22  | intracytoplasmic sperm injection\$.ab,ti. (6846)                 |
| 23  | IUI.ab,ti. (1679)                                                |
| 24  | IVF.ab,ti. (22504)                                               |
| 25  | IVF-ET.ab,ti. (2240)                                             |

| SET | Ovid MEDLINE (Results)                                                                                                                                                                                                     |
|-----|----------------------------------------------------------------------------------------------------------------------------------------------------------------------------------------------------------------------------|
| 26  | (ovari\$ adj2 stimulat\$).ab,ti. (6738)                                                                                                                                                                                    |
| 27  | (ovari\$ adj2 induction).ab,ti. (283)                                                                                                                                                                                      |
| 28  | intrauterine insemination\$.ab,ti. (2409)                                                                                                                                                                                  |
| 29  | ovulation\$.ab,ti. (29477)                                                                                                                                                                                                 |
| 30  | reproductive procedure.ab,ti. (17)                                                                                                                                                                                         |
| 31  | reproduction techniques.ab,ti. (796)                                                                                                                                                                                       |
| 32  | PCOS.ab,ti. (10336)                                                                                                                                                                                                        |
| 33  | (polycyst\$ adj2 ovar\$).ab,ti. (15671)                                                                                                                                                                                    |
| 34  | sexual sterilit\$.ab,ti. (17)                                                                                                                                                                                              |
| 35  | subfecund\$.ab,ti. (143)                                                                                                                                                                                                   |
| 36  | subfertil\$.ab,ti. (4854)                                                                                                                                                                                                  |
| 37  | superovulat\$.ab,ti. (3338)                                                                                                                                                                                                |
| 38  | 1 or 2 or 3 or 4 or 5 or 6 or 7 or 8 or 9 or 10 or 11 or 12 or 13 or 14 or 15 or 16 or 17 or 18 or 19 or 20 or 21 or 22 or 23 or 24 or 25 or 26 or 27 or 28 or 29 or 30 or 31 or 32 or 33 or 34 or 35 or 36 or 37 (362548) |
| 39  | exp Overweight/ (205669)                                                                                                                                                                                                   |
| 40  | exp Thinness/ (5692)                                                                                                                                                                                                       |
| 41  | exp Body Weight/ (443304)                                                                                                                                                                                                  |
| 42  | exp "Body Weights and Measures"/ (581136)                                                                                                                                                                                  |
| 43  | exp Body Mass Index/ (119134)                                                                                                                                                                                              |
| 44  | (obesit\$ or obese\$ or overweight\$ or over weigh\$ or adiposit\$ or corpulen\$ or body mass index or BMI or waist hip ratio\$).ab,ti. (421443)                                                                           |
| 45  | (body adj2 (weight\$ or size\$ or fat\$)).ab,ti. (254733)                                                                                                                                                                  |
| 46  | (waist circumference or skinfold thickness or thinness\$ or underweigh\$ or leanness\$ or weight insufficien\$).ab,ti. (40898)                                                                                             |
| 47  | (weight adj2 (reduc\$ or los\$ or control\$ or manage\$ or gain\$)).ab,ti. (172215)                                                                                                                                        |
| 48  | (Low weigh\$ or Weight Loss or Low body weight\$ or low-body-weight or Light-weight).ab,ti. (86745)                                                                                                                        |
| 49  | 39 or 40 or 41 or 42 or 43 or 44 or 45 or 46 or 47 or 48 (1010668)                                                                                                                                                         |
| 50  | exp Body Weight Changes/ (67581)                                                                                                                                                                                           |
| 51  | exp Weight Reduction Programs/ (1882)                                                                                                                                                                                      |

| SET | Ovid MEDLINE (Results)                                                                                                                                                      |
|-----|-----------------------------------------------------------------------------------------------------------------------------------------------------------------------------|
| 52  | exp Nutrition Therapy/ (97183)                                                                                                                                              |
| 53  | exp Diet Therapy/ (52099)                                                                                                                                                   |
| 54  | exp Health Education/ (234722)                                                                                                                                              |
| 55  | exp Health Behavior/ (300443)                                                                                                                                               |
| 56  | exp Psychotherapy/ (188560)                                                                                                                                                 |
| 57  | exp Behavior Therapy/ (71005)                                                                                                                                               |
| 58  | exp Cognitive Behavioral Therapy/ (26232)                                                                                                                                   |
| 59  | exp Counseling/ (42124)                                                                                                                                                     |
| 60  | exp Complementary Therapies/ (219329)                                                                                                                                       |
| 61  | exp Exercise/ (181688)                                                                                                                                                      |
| 62  | exp Exercise Therapy/ (47018)                                                                                                                                               |
| 63  | exp Life Style/ (87692)                                                                                                                                                     |
| 64  | exp Social Support/ (67748)                                                                                                                                                 |
| 65  | exp Nursing Care/ (132350)                                                                                                                                                  |
| 66  | (weight adj2 (management\$ or intervention\$ or program\$ or education\$ or counsel\$ or advi\$ or diet*)).ab,ti. (18352)                                                   |
| 67  | (diet\$ adj2 (calori\$ or energ\$ or exercise\$ or modif\$ or management\$ or intervention\$ or therp\$ or program\$ or education\$ or counsel\$ or advi\$)).ab,ti. (44972) |
| 68  | (nutrition\$ adj2 (intervention\$ or therp\$ or program\$ or education\$ or counsel\$ or advi\$)).ab,ti. (18512)                                                            |
| 69  | (exercise\$ or physical activit\$ or physical fitnes\$).ab,ti. (356480)                                                                                                     |
| 70  | (lifestyle\$ adj2 (modif\$ or change\$ or management\$ or intervention\$ or therp\$ or program\$ or education\$ or counsel\$ or advi\$)).ab,ti. (24657)                     |
| 71  | (behavio\$ adj2 (modif\$ or change\$ or management\$ or intervention\$ or therp\$ or program\$ or education\$ or counsel\$ or advi\$)).ab,ti. (71157)                       |
| 72  | (psycho\$ adj2 (therp\$ or education\$ or intervention\$ or program\$)).ab,ti. (21711)                                                                                      |
| 73  | (cogniti\$ adj2 (therp\$ or education\$ or intervention\$ or program\$)).ab,ti. (6530)                                                                                      |
| 74  | (cognitive behavio\$ adj2 (education\$ or intervention\$ or program\$)).ab,ti. (2958)                                                                                       |
| 75  | cognitive behavioral therap\$.ab,ti. (8324)                                                                                                                                 |
| 76  | CBT.ab,ti. (9679)                                                                                                                                                           |
| 77  | social support\$.ab,ti. (35833)                                                                                                                                             |

| SET | Ovid MEDLINE (Results)                                                                                                                                                                                                                                                                           |
|-----|--------------------------------------------------------------------------------------------------------------------------------------------------------------------------------------------------------------------------------------------------------------------------------------------------|
| 78  | directive counsel\$.ab,ti. (165)                                                                                                                                                                                                                                                                 |
| 79  | (sex\$ adj3 (counsel\$ or therap\$)).ab,ti. (4486)                                                                                                                                                                                                                                               |
| 80  | prescriptive counsel\$.ab,ti. (3)                                                                                                                                                                                                                                                                |
| 81  | motivational interview\$.ab,ti. (3735)                                                                                                                                                                                                                                                           |
| 82  | stress management\$.ab,ti. (4354)                                                                                                                                                                                                                                                                |
| 83  | (complementar\$ adj2 (therap\$ or treatment\$ or techni\$ or medicine)).ab,ti. (11842)                                                                                                                                                                                                           |
| 84  | (alternat\$ adj2 (therap\$ or treatment\$ or techni\$)).ab,ti. (54858)                                                                                                                                                                                                                           |
| 85  | (mind body intervention\$ or mind body program\$).ab,ti. (332)                                                                                                                                                                                                                                   |
| 86  | mindfulness.ab,ti. (6106)                                                                                                                                                                                                                                                                        |
| 87  | aroma therap\$.ab,ti. (50)                                                                                                                                                                                                                                                                       |
| 88  | relaxation therap\$.ab,ti. (634)                                                                                                                                                                                                                                                                 |
| 89  | acupuncture\$.ab,ti. (20641)                                                                                                                                                                                                                                                                     |
| 90  | acupressure.ab,ti. (1012)                                                                                                                                                                                                                                                                        |
| 91  | meditation\$.ab,ti. (4600)                                                                                                                                                                                                                                                                       |
| 92  | yoga\$.ab,ti. (4234)                                                                                                                                                                                                                                                                             |
| 93  | hypno\$.ab,ti. (21507)                                                                                                                                                                                                                                                                           |
| 94  | non?surgical\$.ab,ti. (15321)                                                                                                                                                                                                                                                                    |
| 95  | non?pharmacological\$.ab,ti. (3735)                                                                                                                                                                                                                                                              |
| 96  | (nursing care\$ or nursing intervention\$ or Nursing Care Management\$).ab,ti. (29869)                                                                                                                                                                                                           |
| 97  | 50 or 51 or 52 or 53 or 54 or 55 or 56 or 57 or 58 or 59 or 60 or 61 or 62 or 63 or 64 or 65 or 66 or 67 or 68 or 69 or 70 or 71 or 72 or 73 or 74 or 75 or 76 or 77 or 78 or 79 or 80 or 81 or 82 or 83 or 84 or 85 or 86 or 87 or 88 or 89 or 90 or 91 or 92 or 93 or 94 or 95 or 96 (1809631) |
| 98  | 38 and 49 and 97 (3505)                                                                                                                                                                                                                                                                          |
| 99  | exp Random Allocation/ (100017)                                                                                                                                                                                                                                                                  |
| 100 | exp Controlled Clinical Trial/ (576359)                                                                                                                                                                                                                                                          |
| 101 | exp Randomized Controlled Trial/ (487993)                                                                                                                                                                                                                                                        |
| 102 | exp Clinical Trial/ (833435)                                                                                                                                                                                                                                                                     |
| 103 | (randomised* or randomized*).ab,ti. (581281)                                                                                                                                                                                                                                                     |
| 104 | clinical trial.ab,ti. (129527)                                                                                                                                                                                                                                                                   |

---

SET Ovid MEDLINE (Results)

---

105 (random\* adj25 (trial\* or stud\* or investigat\* or cross over or crossover)).ab,ti. (658827)

106 Controlled Clinical Trial.ab,ti. (13715)

107 Random Allocation.ab,ti. (1553)

---

108 99 or 100 or 101 or 102 or 103 or 104 or 105 or 106 or 107 (1337746)

---

109 98 and 108 (620)

---

110 limit 109 to humans (386)

---

3

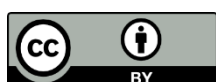

© 2020 by the authors. Submitted for possible open access publication under the terms and conditions of the Creative Commons Attribution (CC BY) license (<http://creativecommons.org/licenses/by/4.0/>).

4
