# Supplementary material for: Effectiveness of Non-Pharmacological Interventions for Overweight or Obese Infertile Women: A Systematic Review and Meta-Analysis
Source: MDPI journal article supplement (doi:10.3390/ijerph17207438), 2020-10-13
Supplement: s1 [file s1]

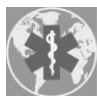

# Supplementary File S3: Sensitivity analysis

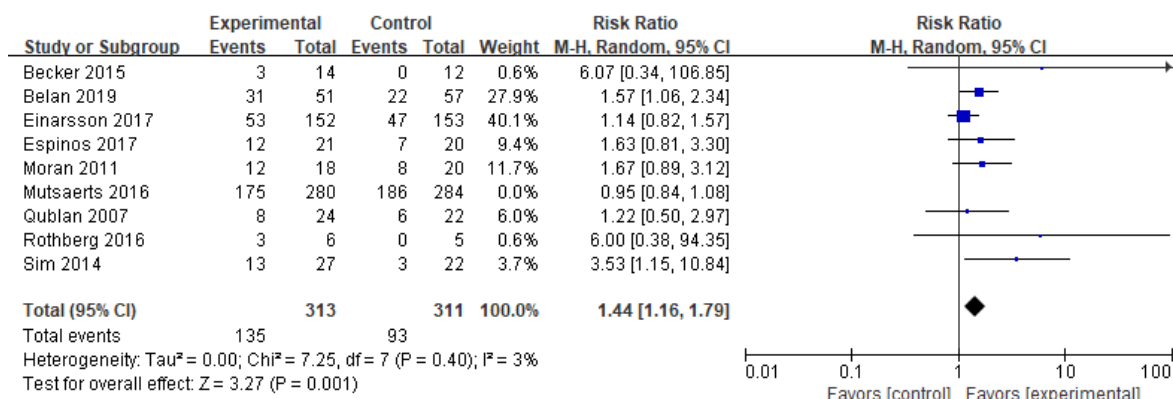

Figure S1. Post hoc sensitivity analysis-pregnancy rate.

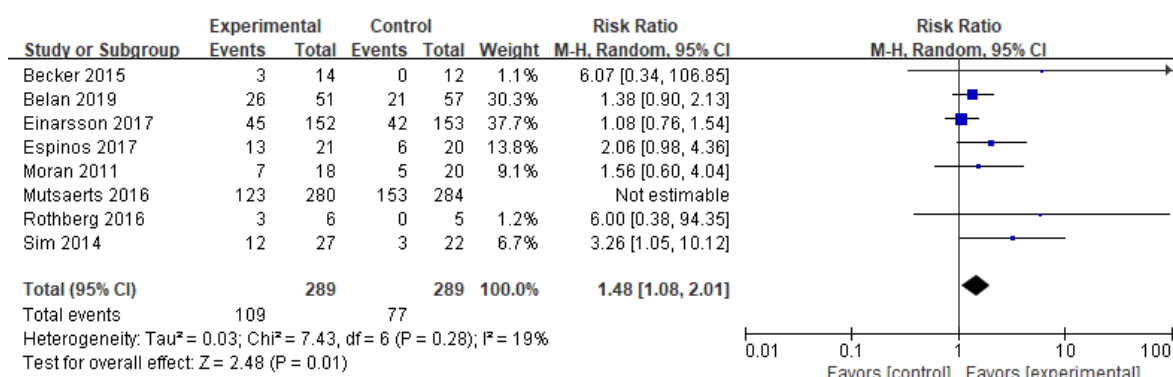

Figure S1. Post hoc sensitivity analysis-live birth rate.

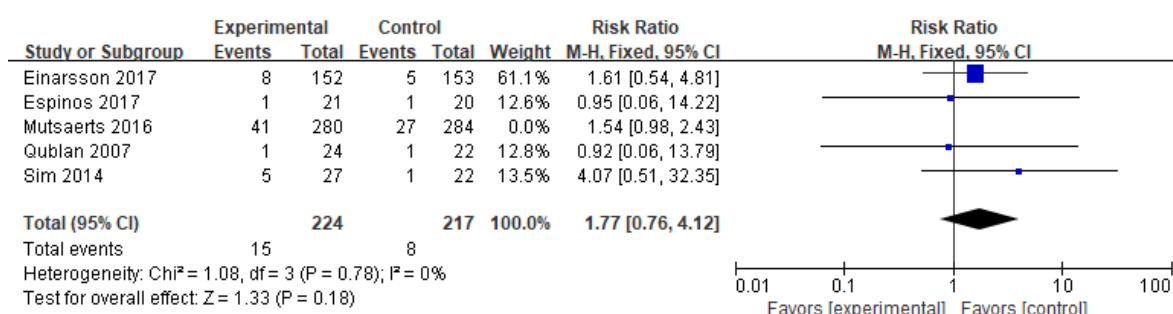

Figure S2. Post hoc sensitivity analysis--miscarriage rate.

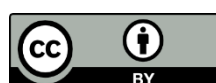

© 2020 by the authors. Submitted for possible open access publication under the terms and conditions of the Creative Commons Attribution (CC BY) license (<http://creativecommons.org/licenses/by/4.0/>).
