# Supplementary material for: Effectiveness of Non-Pharmacological Interventions for Overweight or Obese Infertile Women: A Systematic Review and Meta-Analysis
Source: MDPI journal article supplement (doi:10.3390/ijerph17207438), 2020-10-13
Supplement: s1 [file s1]

**Supplementary File S2: The reasons for exclusion of all studies that were excluded after a full-text review are listed below.****Table S2. Excluded studies (N=147).**

|    | Study                                                    | Category for exclusion  | Detail Reason(s) for Exclusion                                                                                        |
|----|----------------------------------------------------------|-------------------------|-----------------------------------------------------------------------------------------------------------------------|
| 1  | Kadoura S.A. & Nattouf M. 2019 [S1]                      | Not relevant population | Ineligible for infertility criteria or not trying to conceive (PCOS), ineligible for obesity or overweight criteria   |
| 2  | Jamilian M.Z. et al. 2018 [S2]                           | Not relevant population | Ineligible for infertility criteria or not trying to conceive (PCOS), ineligible for obesity or overweight criteria   |
| 3  | Vizza L.S. et al. 2016 [S3]                              | Not relevant population | Ineligible for infertility criteria or not trying to conceive, ineligible for obesity or overweight criteria          |
| 4  | Almenning I. et al. 2015 [S4]                            | Not relevant population | Ineligible for infertility criteria or not trying to conceive, ineligible for obesity or overweight criteria          |
| 5  | Glueck C.J. et al. 2013 [S5]                             | Not relevant population | Ineligible for infertility criteria or not trying to conceive, ineligible for obesity or overweight criteria          |
| 6  | Johansson J. et al. 2013 [S6]                            | Not relevant population | Ineligible for infertility criteria or not trying to conceive, ineligible for obesity or overweight criteria          |
| 7  | Jedel E. L. et al. 2011 [S7]                             | Not relevant population | Ineligible for infertility criteria or not trying to conceive (PCOS), ineligible for obesity or overweight criteria   |
| 8  | Wehr E.P. and Obermayer-Pietsch T. R. 2011 [S8]          | Not relevant population | Ineligible for infertility criteria or not trying to conceive, ineligible for obesity or overweight criteria, non-RCT |
| 9  | Moran L.J. et al. 2006 [S9]                              | Not relevant population | Ineligible for infertility criteria or not trying to conceive (PCOS), ineligible for obesity or overweight criteria   |
| 10 | Esmael M. & Nashed G.A. 2019 [S10]                       | Not relevant population | Ineligible for infertility criteria or not trying to conceive (PCOS)                                                  |
| 11 | Donne M., Alibrandi D., Papa A. & Benvenga M. 2019 [S11] | Not relevant population | Ineligible for infertility criteria or not trying to conceive (PCOS)                                                  |
| 12 | Tiwari N., Pasrija S. and Jain S. 2019 [S12]             | Not relevant population | Ineligible for infertility criteria or not trying to conceive (PCOS)                                                  |
| 13 | Hiam D. et al. 2019 [S13]                                | Not relevant population | Ineligible for infertility criteria or not trying to conceive (PCOS)                                                  |
| 14 | Munir S. S. et al. 2018 [S14]                            | Not relevant population | Ineligible for infertility criteria or not trying to conceive (PCOS)                                                  |

|    | Study                                                                  | Category for exclusion  | Detail Reason(s) for Exclusion                                                                  |
|----|------------------------------------------------------------------------|-------------------------|-------------------------------------------------------------------------------------------------|
| 15 | Abd Al Samea G.A.,<br>Mahmoud N. F. Hamada<br>H.A. Gabr A.A.2018 [S15] | Not relevant population | Ineligible for infertility criteria or not trying to conceive (PCOS)                            |
| 16 | Miranda-Furtado C.L. et al.<br>2018 [S16]                              | Not relevant population | Ineligible for infertility criteria or not trying to conceive (PCOS)                            |
| 17 | Mani H. et al. 2018 [S17]                                              | Not relevant population | Ineligible for infertility criteria or not trying to conceive (PCOS),                           |
| 18 | Lopes I. P. et al. 2018<br>[S18]                                       | Not relevant population | Ineligible for infertility criteria or not trying to conceive (PCOS), secondary analysis of RCT |
| 19 | Lara L. et al. 2018 [S19]                                              | Not relevant population | Ineligible for infertility criteria or not trying to conceive (PCOS)                            |
| 20 | Khan A. A. and Begum W.<br>2018 [S20]                                  | Not relevant population | Ineligible for infertility criteria or not trying to conceive (PCOS)                            |
| 21 | Foroozanfard F. R. et al.<br>2017 [S21]                                | Not relevant population | Ineligible for infertility criteria or not trying to conceive (PCOS)                            |
| 22 | Matsuzaki T. D. et al. 2017<br>[S22]                                   | Not relevant population | Ineligible for infertility criteria or not trying to conceive                                   |
| 23 | Bauer J. L. et al. 2017<br>[S23]                                       | Not relevant population | Ineligible for infertility criteria or not trying to conceive                                   |
| 24 | McBreairty L.E. et al. 2017<br>[S24]                                   | Not relevant population | Ineligible for infertility criteria or not trying to conceive (PCOS)                            |
| 25 | Lai L. et al. 2017 [S25]                                               | Not relevant population | Ineligible for infertility criteria or not trying to conceive (PCOS)                            |
| 26 | Jafari-Sfidvajani S. et al.<br>2017 [S26]                              | Not relevant population | Ineligible for infertility criteria or not trying to conceive (PCOS)                            |
| 27 | Hmedeh C., et al. 2017<br>[S27]                                        | Not relevant population | Ineligible for infertility criteria or not trying to conceive                                   |
| 28 | Foroozanfard F. et al. 2017<br>[S28]                                   | Not relevant population | Ineligible for infertility criteria or not trying to conceive (PCOS)                            |
| 29 | Azadi-Yazd M. et al. 2017<br>[S29]                                     | Not relevant population | Ineligible for infertility criteria or not trying to conceive (PCOS)                            |
| 30 | Dokras A. et al. 2016 [S30]                                            | Not relevant population | Ineligible for infertility criteria or not trying to conceive                                   |
| 31 | Cooney L. et al. 2016 [S31]                                            | Not relevant population | Ineligible for infertility criteria or not trying to conceive                                   |
| 32 | Lai L.F. et al. 2015 [S32]                                             | Not relevant population | Ineligible for infertility criteria or not trying to conceive (PCOS)                            |

|    | Study                                                    | Category for exclusion  | Detail Reason(s) for Exclusion                                                                    |
|----|----------------------------------------------------------|-------------------------|---------------------------------------------------------------------------------------------------|
| 33 | Sweatt K., et al. 2015 [S33]                             | Not relevant population | Ineligible for infertility criteria or not trying to conceive (PCOS)                              |
| 34 | Stepito N. 2015 [S34]                                    | Not relevant population | Ineligible for infertility criteria or not trying to conceive (PCOS)                              |
| 35 | Yu L.L. et al. 2013 [S35]                                | Not relevant population | Ineligible for infertility criteria or not trying to conceive (PCOS)                              |
| 36 | Zello G.R. et al. 2013 [S36]                             | Not relevant population | Ineligible for infertility criteria or not trying to conceive (PCOS)                              |
| 37 | Thomson R.L. et al. 2013 [S37]                           | Not relevant population | Ineligible for infertility criteria or not trying to conceive, secondary analysis of cohort study |
| 38 | Jakubowicz D.D. and Wainstein Y.B. 2013 [S38]            | Not relevant population | Ineligible for infertility criteria or not trying to conceive (PCOS)                              |
| 39 | Zheng Y. H. et al. 2013 [S39]                            | Not relevant population | Ineligible for infertility criteria or not trying to conceive                                     |
| 40 | Nybacka Å. et al. 2013 [S40]                             | Not relevant population | Ineligible for infertility criteria or not trying to conceive                                     |
| 41 | Thomson R. L. et al. 2012 [S41]                          | Not relevant population | Ineligible for infertility criteria or not trying to conceive, secondary analysis of RCT          |
| 42 | Nyback A. et al. 2012a [S42]                             | Not relevant population | Ineligible for infertility criteria or not trying to conceive (PCOS)                              |
| 43 | Li D. 2012 [S43]                                         | Not relevant population | Ineligible for infertility criteria or not trying to conceive (PCOS)                              |
| 44 | Le Donne M. A. et al. 2012 [S44]                         | Not relevant population | Ineligible for infertility criteria or not trying to conceive (PCOS)                              |
| 45 | Nyback A. et al. 2012b [S45]                             | Not relevant population | Ineligible for infertility criteria or not trying to conceive (PCOS)                              |
| 46 | Mehrabani H. H. et al. 2012 [S46]                        | Not relevant population | Ineligible for infertility criteria or not trying to conceive                                     |
| 47 | Nybacka A. et al. 2011 [S47]                             | Not relevant population | Ineligible for infertility criteria or not trying to conceive (PCOS)                              |
| 48 | Moran L.J. et al. 2011 [S48]                             | Not relevant population | Ineligible for infertility criteria or not trying to conceive (PCOS)                              |
| 49 | Redman L.M. Elkind-Hirsch K. and Ravussin, E. 2011 [S49] | Not relevant population | Ineligible for infertility criteria or not trying to conceive, non-RCT                            |

|    | Study                                                 | Category for exclusion  | Detail Reason(s) for Exclusion                                       |
|----|-------------------------------------------------------|-------------------------|----------------------------------------------------------------------|
| 50 | Moran L.J. et al. 2010 [S50]                          | Not relevant population | Ineligible for infertility criteria or not trying to conceive (PCOS) |
| 51 | Fux Otta C. et al. 2010 [S51]                         | Not relevant population | Ineligible for infertility criteria or not trying to conceive        |
| 52 | Thomson R.L. et al. 2009 [S52]                        | Not relevant population | Ineligible for infertility criteria or not trying to conceive (PCOS) |
| 53 | Moro C.P., Elkind-Hirsch M. and Redman K.2009 [S53]   | Not relevant population | Ineligible for infertility criteria or not trying to conceive (PCOS) |
| 54 | Panidis D. F. et al. 2008 [S54]                       | Not relevant population | Ineligible for infertility criteria or not trying to conceive (PCOS) |
| 55 | Thomson R.L. et al. 2008 [S55]                        | Not relevant population | Ineligible for infertility criteria or not trying to conceive        |
| 56 | Florakis D. et al. 2008 [S56]                         | Not relevant population | Ineligible for infertility criteria or not trying to conceive (PCOS) |
| 57 | Bruner B.C. and Chizen, D.2006 [S57]                  | Not relevant population | Ineligible for infertility criteria or not trying to conceive (PCOS) |
| 58 | Gambiner A.P. et al. 2005 [S58]                       | Not relevant population | Ineligible for infertility criteria or not trying to conceive (PCOS) |
| 59 | Gambiner A.P. et al. 2004 [S59]                       | Not relevant population | Ineligible for infertility criteria or not trying to conceive (PCOS) |
| 60 | Vanky E., Salvesen K.A. and Carlsenm S. M. 2004 [S60] | Not relevant population | Ineligible for infertility criteria or not trying to conceive        |
| 61 | Stamets K. et al. 2004 [S61]                          | Not relevant population | Ineligible for infertility criteria or not trying to conceive        |
| 62 | Hoeger K. M. et al. 2004 [S62]                        | Not relevant population | Ineligible for infertility criteria or not trying to conceive        |
| 63 | Gambineri A.P. et al. 2003 [S63]                      | Not relevant population | Ineligible for infertility criteria or not trying to conceive (PCOS) |
| 64 | Moran L. J. et al. 2003 [S64]                         | Not relevant population | Ineligible for infertility criteria or not trying to conceive        |
| 65 | Pasquali et al. R. G. 2000 [S65]                      | Not relevant population | Ineligible for infertility criteria or not trying to conceive (PCOS) |
| 66 | Crave J. C. et al. 1995 [S66]                         | Not relevant population | Ineligible for infertility criteria or not trying to conceive        |
| 67 | Guzick D. S. et al. 1994 [S67]                        | Not relevant population | Ineligible for infertility criteria or not trying to conceive        |

|    | Study                                                      | Category for exclusion    | Detail Reason(s) for Exclusion                                           |
|----|------------------------------------------------------------|---------------------------|--------------------------------------------------------------------------|
| 68 | Pasquali R. F. and Venturoli R. 1986 [S68]                 | Not relevant population   | Ineligible for infertility criteria or /not trying to conceive (PCOS)    |
| 69 | Smith C.A. et al. 2018 [S69]                               | Not relevant population   | Ineligible for obesity or overweight criteria,                           |
| 70 | Li J.W. et al. 2018 [S70]                                  | Not relevant population   | Ineligible for obesity or overweight criteria, secondary analysis of RCT |
| 71 | Wu X. K. et al. 2017 [S71]                                 | Not relevant population   | Ineligible for t obesity or overweight                                   |
| 72 | Radin R.M. et al. 2016 [S72]                               | Not relevant population   | Ineligible for obesity or overweight                                     |
| 73 | Gillerman K. et al. 2016 [S73]                             | Not relevant population   | Ineligible for obesity or overweight                                     |
| 74 | Cochrane S. et al. 2016 [S74]                              | Not relevant population   | Ineligible for obesity or overweight criteria                            |
| 75 | Firouzabadi R. D. et al. 2012 [S75]                        | Not relevant population   | Ineligible for obesity or overweight criteria                            |
| 76 | Rosety M. Á . et al. 2017 [S76]                            | Not relevant population   | Infertility related to male                                              |
| 77 | Maleki B. H. and Tartibian B. 2017 [S77]                   | Not relevant population   | Infertility related to male                                              |
| 78 | Fontenot G. K. and Podolski, J. 2017 [S78]                 | Not relevant population   | Infertility related to male                                              |
| 79 | Rafiee B.M. and Rahimi-Ghalati M. H. 2016 [S79]            | Not relevant population   | Infertility related to male                                              |
| 80 | Collins C. E. et al. 2013 [S80]                            | Not relevant population   | Infertility related to male                                              |
| 81 | Machlitt, A.R., Steinheim, E. and Pfueller, B.F.2007 [S81] | Not relevant intervention | Pharmacological intervention                                             |
| 82 | Steeegers-Theunissen R. P. 2018 [S82]                      | Not relevant study design | Non-experimental study                                                   |
| 83 | Deng Y. et al. 2017 [S83]                                  | Not relevant study design | Non-experimental study                                                   |
| 84 | Kaya Y. et al. 2016 [S84]                                  | Not relevant study design | Non-RCT                                                                  |
| 85 | Moore A.K.et al. 2016 [S85]                                | Not relevant study design | Non-RCT                                                                  |
| 86 | Swaroop A. et al. 2015 [S86]                               | Not relevant study design | Non-RCT                                                                  |

|     | Study                                                | Category for exclusion    | Detail Reason(s) for Exclusion                                                                       |
|-----|------------------------------------------------------|---------------------------|------------------------------------------------------------------------------------------------------|
| 87  | Polotsky A.J.et al. 2015 [S87]                       | Not relevant study design | Secondary analysis of RCT                                                                            |
| 88  | Miller P.B., Forstein D.A. and Styles S.2008 [S88]   | Not relevant study design | Non-RCT                                                                                              |
| 89  | Palomba S.et al.2008 [S89]                           | Not relevant study design | Non-RCT                                                                                              |
| 90  | Tsagareli V., Noakes, M. and Norman R. J. 2006 [S90] | Not relevant study design | Non-RCT                                                                                              |
| 91  | Crosignani P. G. et al. 2003 [S91]                   | Not relevant study design | Non-RCT                                                                                              |
| 92  | Stener-Victorin E. et al. 2000 [S92]                 | Not relevant study design | Non-RCT                                                                                              |
| 93  | Clark A.M. et al. 1998 [S93]                         | Not relevant study design | Non-RCT                                                                                              |
| 94  | Galletly C. et al. 1996 [S94]                        | Not relevant study design | Non-RCT                                                                                              |
| 95  | Hollmann M. and Runnebaum B. Gerhard I.1996 [S95]    | Not relevant study design | Non-RCT                                                                                              |
| 96  | Clark A.M. et al. 1996 [S96]                         | Not relevant study design | Non-RCT                                                                                              |
| 97  | Munir S. S. et al. 2018 [S97]                        | Excluded hand             | Excluded duplicates by hand Same study as Munir S. S. et al. 2018 [S14]                              |
| 98  | Den Harink T. et al. 2019 [S98]                      | Excluded hand             | Excluded duplicates by hand (Conference Abstract) Follow up study as Mutsaerts M.A. et al. 2016 [33] |
| 99  | Van Elten T. M. et al. 2019 [S99]                    | Excluded hand             | Excluded duplicates by hand Same study as Mutsaerts M.A. et al. 2016 [33]                            |
| 100 | Wekker V. et al. 2018 [S100]                         | Excluded hand             | Excluded duplicates by hand (Conference Abstract) Same study as Mutsaerts M.A. et al. 2016 [33]      |
| 101 | Van Elten T. M. et al. 2018 [S101]                   | Excluded hand             | Excluded duplicates by hand Same study as Mutsaerts M.A. et al. 2016 [33]                            |
| 102 | Einarsson S. et al. 2018 [S102]                      | Excluded hand             | Excluded duplicates by hand (Conference Abstract) Same study as Einarsson S. et al. 2017 [26]        |
| 103 | Wekker V. et al. 2017 [S103]                         | Excluded hand             | Excluded duplicates by hand (Conference Abstract) Same study as Mutsaerts M.A. et al. 2016 [33]      |
| 104 | Dammen L. et al. 2017 [S104]                         | Excluded hand             | Excluded duplicates by hand (Conference Abstract) Same study as Mutsaerts M.A. et al. 2016 [33]      |
| 105 | Arentz S. et al. 2017 [S105]                         | Excluded hand             | Excluded duplicates by hand (Conference Abstract) Same study as Arentz S. et al.2017 [43]            |

|     | Study                                        | Category for exclusion           |                    | Detail Reason(s) for Exclusion                                      |
|-----|----------------------------------------------|----------------------------------|--------------------|---------------------------------------------------------------------|
| 106 | Van Oers A. et al. 2016 [S106]               | Excluded                         | duplicates by hand | (Conference Abstract) Same study as Mutsaerts M.A. et al. 2016 [33] |
| 107 | Legro R. S. et al. 2016 [S107]               | Excluded                         | duplicates by hand | Same study as Legro R. S. et al. 2015 [39]                          |
| 108 | Legro R. S. et al.2015 [S108]                | Excluded                         | duplicates by hand | (Conference Abstract) Same study as Legro R. S. et al. 2015 [39]    |
| 109 | Duval K. et al.2015 [S109]                   | Excluded                         | duplicates by hand | (Conference abstract) same study as Belan M. et al. 2019 [28]       |
| 110 | Belan M et al.2015 [S110]                    | Excluded                         | duplicates by hand | (Conference abstract) same study as Belan M. et al. 2019 [31]       |
| 111 | Van Oers A. et al.2014 [S111]                | Excluded                         | duplicates by hand | (Conference Abstract) Same study as Mutsaerts M.A. et al. 2016 [33] |
| 112 | Mutsaerts M.A.et al.2014 [S112]              | Excluded                         | duplicates by hand | (Conference Abstract) Same study as Mutsaerts M.A. et al. 2016 [33] |
| 113 | Legro R.S. et al. 2014 [S113]                | Excluded                         | duplicates by hand | (Conference Abstract) Same study as Legro R. S. et al. 2015 [39]    |
| 114 | Sim K.A. et al. 2013 [S114]                  | Excluded                         | duplicates by hand | (Conference Abstract) Same study as Sim K.A. et al. [37]            |
| 115 | Jakubowicz D. et al. 2013 [S115]             | Excluded                         | duplicates by hand | Same study as Jakubowicz D.D. and Wainstein Y.B. 2013 [S 39]        |
| 116 | Espinós-Gómez J.J. 2013 [S116]               | Excluded                         | duplicates by hand | Same study as Espinos J.J. et al. 2017 [32]                         |
| 117 | Sim K. Denyer G. and Caterson I. 2012 [S117] | Excluded                         | duplicates by hand | (Conference Abstract) Same study as Sim K.A. et al. [37]            |
| 118 | Kjellberg A.T. 2012 [S118]                   | Excluded                         | duplicates by hand | Same study as Einarsson S. et al.2017 [26]                          |
| 119 | Ma H. and Zheng Y.H. 2012 [S119]             | Excluded                         | duplicates by hand | Same study as Zheng Y. H. et al. 2013 [S39]                         |
| 120 | Palomba S. et al. 2010 [S120]                | Excluded                         | duplicates by hand | (Conference Abstract) Same study as Palomba S. et al. 2010. [40]    |
| 121 | Yin Y. et al. 2018 [S121]                    | Not available results in English |                    | Not available results in English                                    |
| 122 | Shen L.Y. et al. 2018 [S122]                 | Not available results in English |                    | Not available results in English                                    |
| 123 | Cao Y. et al. 2017 [S123]                    | Not available results in English |                    | Not available results in English                                    |

|                                                                | Study                                    | Category for exclusion           | Detail Reason(s) for Exclusion                                           |
|----------------------------------------------------------------|------------------------------------------|----------------------------------|--------------------------------------------------------------------------|
| 124                                                            | Nasrekani Z. A. and Fathi M. 2016 [S124] | Not available results in English | Not available results in English                                         |
| 125                                                            | Lai M. H. et al. 2010 [S125]             | Not available results in English | Not available results in English                                         |
| 126                                                            | Hamayeli Mehrabani H. et al. 2010 [S126] | Not available results in English | Not available results in English                                         |
| 127                                                            | Esmailzadeh S. et al. 2010 [S127]        | Not available results in English | Not available results in English                                         |
| 128                                                            | Baillargeon J.P. 2019 [S128]             | Protocol only study              | Protocol study (ongoing study) , same study as Belan M. et al. 2019 [31] |
| 129                                                            | Casals G. 2018 [S129]                    | Protocol only study              | Protocol study (ongoing study)                                           |
| 130                                                            | Sathyapalan T. 2017 [S130]               | Protocol only study              | Protocol study                                                           |
| 131                                                            | Jiskoot G. et al. 2017 [S131]            | Protocol only study              | Protocol study, same study as Jiskoot G. et al.2019 [35]                 |
| 132                                                            | Duval K. et al. 2015 a [S132]            | Protocol only study              | Protocol study, same study as Belan M. et al. 2019 [31]                  |
| 133                                                            | Santoro N. et al. 2015 [S133]            | Protocol only study              | Protocol study (ongoing study)                                           |
| 134                                                            | Mutsaerts M.A. et al. 2010 [S134]        | Protocol only study              | Protocol study, as Mutsaerts M.A. et al. 2016 [33]                       |
| Excluded during data extraction due to sharing same population |                                          |                                  |                                                                          |
| 135                                                            | van Elten T.M. et al. 2019 [S135]        | Sharing same population          | Follow up study as Mutsaerts M.A. et al. 2016 [33]                       |
| 136                                                            | van Dammen L. et al. 2019 [S136]         | Sharing same population          | Follow up study as Mutsaerts M.A. et al. 2016 [33]                       |
| 137                                                            | Einarsson S. et al. 2019 [S137]          | Sharing same population          | Secondary analysis of Einarsson S. et al.2017 [26]                       |
| 138                                                            | van Elten T.M. et al. 2018 [S138]        | Sharing same population          | Secondary analysis as Mutsaerts M.A. et al. 2016 [33]                    |
| 139                                                            | Wekker V. et al. 2018 [S139]             | Sharing same population          | Follow up study as Mutsaerts M.A. et al. 2016 [33]                       |
| 140                                                            | van Dammen L. et al. 2018 [S140]         | Sharing same population          | Secondary analysis as Mutsaerts M.A. et al. 2016 [33]                    |
| 141                                                            | van Oers A.M. et al. 2017 [S141]         | Sharing same population          | Cost effective analysis as Mutsaerts M.A. et al. 2016 [33]               |
| 142                                                            | van Oers A.M. et al. 2016 [S142]         | Sharing same population          | Subgroup analysis as Mutsaerts M.A. et al. 2016 [33]                     |



|     | Study                         | Category for exclusion  | Detail Reason(s) for Exclusion                                |
|-----|-------------------------------|-------------------------|---------------------------------------------------------------|
| 143 | Moran L.J. et al. 2016 [S143] | Sharing same population | Secondary analysis as Moran L. et al. 2011[29]                |
| 144 | Jiskoot G. et al. 2018 [S144] | Sharing same population | (Abstract only) same study as Jiskoot G. et al.2019 [35]      |
| 145 | Belan M. et al. 2019 a [S145] | Sharing same population | (Conference abstract) same study as Belan M. et al. 2019 [31] |
| 146 | Belan M. et al. 2019b [S146]  | Sharing same population | (Conference abstract) same study as Belan M. et al. 2019 [31] |
| 147 | Duval K. et al. 2015b [S147]  | Sharing same population | (Conference abstract) same study as Belan M. et al. 2019 [31] |

## References

- S1. Kadoura, S. A., M. Nattouf, A. H., Effect of calcium and vitamin d supplements as an adjuvant therapy to metformin on menstrual cycle abnormalities, hormonal profile, and IGF-1 system in polycystic ovary syndrome patients: A randomized, placebo-controlled clinical trial. *Adv Pharmacol Sci* **2019**, 2019. <https://doi.org/10.1155/2019/9680390>
- S2. Jamilian, M. Z. M., S. Amiri Siavashani, M. Karimi, M. Mafi, A. Ostadmohammadi, V. Asemi, Z., The Influences of Chromium Supplementation on Glycemic Control, Markers of Cardio-Metabolic Risk, and Oxidative Stress in Infertile Polycystic ovary Syndrome Women Candidate for In vitro Fertilization: a Randomized, Double-Blind, Placebo-Controlled Trial. *Biological Trace Element Research* **2018**, 185 (1), 48-55. <https://doi.org/10.1007/s12011-017-1236-3>
- S3. Vizza, L. S., C. A. Swaraj, S. Agho, K. Cheema, B. S., The feasibility of progressive resistance training in women with polycystic ovary syndrome: A pilot randomized controlled trial. *BMC Sports Sci Med Rehabil* **2016**, 8 (1). <https://doi.org/10.1186/s13102-016-0039-8>
- S4. Alménning, I.; Rieber-Mohn, A.; Lundgren, K. M.; Lovvik, T. S.; Garnæs, K. K.; Moholdt, T., Effects of high intensity interval training and strength training on metabolic, cardiovascular and hormonal outcomes in women with polycystic ovary syndrome: a pilot study. *PLoS ONE* **2015**, 10 (9) <https://doi.org/10.1371/journal.pone.0138793>
- S5. Glueck, C. J.; Goldenberg, N.; Pranikoff, J.; Khan, Z.; Padda, J.; Wang, P., Effects of metformin-diet intervention before and throughout pregnancy on obstetric and neonatal outcomes in patients with polycystic ovary syndrome. *Curr Med Res Opin* **2013**, 29 (1), 55-62. <https://doi.org/10.1185/03007995.2012.755121>
- S6. Johansson, J.; Redman, L.; Veldhuis, P. P.; Sazonova, A.; Labrie, F.; Holm, G.; Johansson, G.; Stener-Victorin, E., Acupuncture for ovulation induction in polycystic ovary syndrome: a randomized controlled trial. *Am. J. Physiol. Endocrinol. Metab.* **2013**, 304 (9), E934-943. <https://doi.org/10.1152/ajpendo.00039.2013>
- S7. Jedel, E. L., F. Oden, A. Holm, G. Nilsson, L. Janson, P. O. Lind, A. K. Ohlsson, C. Stener-Victorin, E., Impact of electro-acupuncture and physical exercise on hyperandrogenism and oligo/amenorrhea in women with polycystic ovary syndrome: a randomized controlled trial. *Am. J. Physiol. Endocrinol. Metab.* **2011**, 300 (1), E37-E45. <https://doi.org/10.1152/ajpendo.00495.2010>
- S8. Wehr, E. P., T. R. Obermayer-Pietsch, B., Effect of vitamin D3 treatment on glucose metabolism and menstrual frequency in polycystic ovary syndrome women: A pilot study. *J. Endocrinol. Invest.* **2011**, 34 (10), 757-763. <https://doi.org/10.3275/7748>
- S9. Moran, L. J.; Noakes, M.; Clifton, P. M.; Wittert, G. A.; Williams, G.; Norman, R. J., Short-term meal replacements followed by dietary macronutrient restriction enhance weight loss in polycystic ovary syndrome. *Am. J. Clin. Nutr.* **2006**, 84 (1), 77-87. <https://doi.org/10.1093/ajcn/84.1.77>
- S10. Esmael, M. E. H. A., G. A. Nashed, A. B., Effect of pulsed electromagnetic field versus aerobic exercises on women with polycystic ovary syndrome: A single-blind randomized controlled trial. *ACAM* **2019**, 10 (6), 676-681. <https://doi.org/10.4328/ACAM.6101>

- S11. Donne, M. L. E. M., D. Alibrandi, A. Papa, M. Benvenga, S., Effects of three treatment modalities (diet, myoinositol or myoinositol associated with D-chiro-inositol) on clinical and body composition outcomes in women with polycystic ovary syndrome. *Eur Rev Med Pharmacol Sci* **2019**, *23* (5), 2293-2301. [https://doi.org/10.26355/eurev\\_201903\\_17278](https://doi.org/10.26355/eurev_201903_17278)
- S12. Tiwari, N.; Pasrija, S.; Jain, S., Randomised controlled trial to study the efficacy of exercise with and without metformin on women with polycystic ovary syndrome. *Eur. J. Obstet. Gynecol. Reprod. Biol.* **2019**, *234*, 149-154. <https://doi.org/10.1016/j.ejogrb.2018.12.021>
- S13. Hiam, D.; Patten, R.; Gibson-Helm, M.; Moreno-Asso, A.; McIlvenna, L.; Levinger, I.; Harrison, C.; Moran, L. J.; Joham, A.; Parker, A.; et al., The effectiveness of high intensity intermittent training on metabolic, reproductive and mental health in women with polycystic ovary syndrome: study protocol for the iHIT-randomised controlled trial. *Trials* **2019**, *20* (1) 221. <https://doi.org/10.1186/s13063-019-3313-8>
- S14. Munir, S. S. J., S. Alvi, N. Khan, D. Bin Younis, B. Khan, M., Role of Orlistat Combined With Life Style in the Management of Obese Patients with Polycystic Ovarian Syndrome. *PJMHS* **2018**, *12* (2), 477-480.
- S15. Abd Al Samea, G. A. M., N. F. Hamada, H. A. Gabr, A. A., Influence of pulsed electromagnetic field on dermatological symptoms of hyperandrogen in obese women with polycystic ovarian syndrome: Influence of pulsed electromagnetic field on dermatological symptoms of hyperandrogen in obese women. *Journal of Clinical and Analytical Medicine* **2018**, *9* (6), 493-497. <https://doi.org/10.4328/JCAM.5816>
- S16. Miranda-Furtado, C. L.; Ribeiro, V. B.; Lopes, I. P.; Silva, R. C.; Kogure, G. S.; Pedroso, D. C.; Ferriani, R. A.; Reis, R. M. In *Aerobic physical training reduces anthropometric indexes and hyperandrogenism in polycystic ovary syndrome*, 74th annual congress of the american society for reproductive medicine(ASRM 2018), Denver colorado, united states, 2018; Fertil. Steril.: Denver colorado, united states, 2018; p e9.
- S17. Mani, H.; Chudasama, Y.; Hadjiconstantinou, M.; Bodicoat, D. H.; Edwardson, C.; Levy, M. J.; Gray, L. J.; Barnett, J.; Daly, H.; Howlett, T. A.; et al., Structured education programme for women with polycystic ovary syndrome: a randomised controlled trial. *Endocr Connect* **2018**, *7* (1), 26-35. <https://doi.org/10.1530/EC-17-0274>
- S18. Lopes, I. P.; Ribeiro, V. B.; Reis, R. M.; Silva, R. C.; Dutra de Souza, H. C.; Kogure, G. S.; Ferriani, R. A.; Silva Lara, L. A. D., Comparison of the Effect of Intermittent and Continuous Aerobic Physical Training on Sexual Function of Women With Polycystic Ovary Syndrome: randomized Controlled Trial. *J Sex Med* **2018**, *15* (11), 1609-1619.
- S19. Lara, L.; Lopes, I. P.; Dos Reis, R. M.; Ribeiro, V. B.; De Souza, H. C. D.; Silva, R. C., Aerobic physical training improves sexual function and qol of pcos women: randomized controlled trial. *Int J Gynaecol Obstet* **2018**, *143*, 357-358. <https://doi.org/10.1002/ijgo.12582>
- S20. Khan, A. A.; Begum, W., Efficacy of Darchini in the management of polycystic ovarian syndrome: a randomized clinical study. *Journal of herbal medicine* **2018**.
- S21. Foroozanfar, F.; Rafiei, H.; Samimi, M.; Gilasi, H. R.; Gorjizadeh, R.; Heidar, Z.; Asemi, Z., The effects of dietary approaches to stop hypertension diet on weight loss, anti-Müllerian hormone and metabolic profiles in women with polycystic ovary syndrome: a randomized clinical trial. *Clin. Endocrinol.* **2017**, *87* (1), 51-58.
- S22. Matsuzaki, T. D., T. Oki, T. Ishihara, O. Okagaki, R. Kajihara, T. Tamura, M. Kotsuji, F. Tajima, K. Kawano, M. Ishizuka, B. Irahara, M., Weight reduction by using a formula diet recovers menstruation in obese patients with an ovulatory disorder. *Reproductive Medicine and Biology* **2017**.
- S23. Bauer, J. L. A.-S., Z. Malkhasyan, A. Harris, M. Eckel, R. H. Bradford, A. P. Robledo, C. Gee, N. A. Polotsky, A. J. In *Omega-3 fatty acid supplementation improves luteal function in obese women*, 99th Annual Meeting of the Endocrine Society, ENDO 2017, United States, Orlando, FL, April 2017; Endocr. Rev.: United States, Orlando, FL, 2017.
- S24. McBreaity, L. E.; Kazemi, M.; Gordon, J. J.; Pierson, R. A.; Chizen, D. R.; Chilibeck, P. D.; Zello, G. A., A randomized clinical trial in women with polycystic ovary syndrome: effects of a pulse-based diet and exercise intervention on blood lipids, body composition and reproductive measures. *FASEB journal* **2017**, *31* (1 Supplement 1).
- S25. Lai, L.; Flower, A.; Prescott, P.; Wing, T.; Moore, M.; Lewith, G., Standardised versus individualised multiherb Chinese herbal medicine for oligomenorrhoea and amenorrhoea in polycystic ovary syndrome: a randomised feasibility and pilot study in the UK. *BMJ open* **2017**, *7* (2), e011709.
- S26. Jafari-Sfidvajani, S.; Ahangari, R.; Hozoori, M.; Mozaffari-Khosravi, H.; Fallahzadeh, H.; Nadjarzadeh, A., The effect of vitamin D supplementation in combination with low-calorie diet on anthropometric indices and androgen hormones in women with polycystic ovary syndrome: a double-blind, randomized, placebo-controlled trial. *J. Endocrinol. Invest.* **2017**, 1-11.

- S27. Hmedeh, C.; Ghazeeri, G.; Tinworth, L.; Tewfik, I. In *The effect of 6 months weight -loss/maintenance on anthropometric, biochemical and psychological profile in Lebanese PCOS women: a prospective randomised control study*, 33rd Annual Meeting of the European Society of Human Reproduction and Embryology., Geneva. Switzerland., July 2017; Hum. Reprod. : Geneva. Switzerland., 2017; pp i451-i452.
- S28. Foroozanfard, F.; Rafiei, H.; Samimi, M.; Gilasi, H. R.; Gorjizadeh, R.; Heidar, Z.; Asemi, Z., The effects of dietary approaches to stop hypertension diet on weight loss, anti-Mullerian hormone and metabolic profiles in women with polycystic ovary syndrome: A randomized clinical trial. *Clin. Endocrinol.* **2017**, *87* (1), 51-58.
- S29. Azadi-Yazdi, M.; Karimi-Zarchi, M.; Salehi-Abargouei, A.; Fallahzadeh, H.; Nadjarzadeh, A., Effects of Dietary Approach to Stop Hypertension diet on androgens, antioxidant status and body composition in overweight and obese women with polycystic ovary syndrome: a randomised controlled trial. *J Hum Nutr Diet* **2017**, *30* (3), 275-283.
- S30. Dokras, A.; Sarwer, D. B.; Allison, K. C.; Milman, L.; Kris-Etherton, P. M.; Kunselman, A. R.; Stetter, C. M.; Williams, N. I.; Gnatuk, C. L.; Estes, S. J.; et al., Weight Loss and Lowering Androgens Predict Improvements in Health-Related Quality of Life in Women With PCOS. *Int J Clin Endocrinol Metab* **2016**, *101* (8), 2966-2974.
- S31. Cooney, L.; Milman, L. W.; Sammel, M.; Allison, K.; Epperson, C.; Dokras, A. In *Cognitive behavioral therapy improves weight loss and quality of life in women with polycystic ovary syndrome (PCOS)*, ASRM Scientific Congress and Expo Scaling New Heights in Reproductive Medicine, ASRM 2016., Salt Lake City, UT. United States, Oct, 2016; Fertil. Steril.: Salt Lake City, UT. United States, 2016; pp e252-e253.
- S32. Lai, L. F., A. Prescott, P. Moore, M. Lewith, G., Chinese herbal medicine for oligomenorrhoea and amenorrhoea in polycystic ovary syndrome: A randomised feasibility study in the United Kingdom. *Integr Med Res* **2015**, *4* (1), 15.
- S33. Sweatt, K.; Ovalle, F.; Azziz, R.; Gower, B. In *The effect of diet and exercise in women with polycystic ovary syndrome*, Experimental Biology 2015, EB Boston, MA United States., March 2015; FASEB J. : EB Boston, MA United States., 2015.
- S34. N., S. The (i)mpact of (H)igh (I)ntensity intermittent (T)raining on health and mechanisms of insulin resistance in women with (P)oly(c)ystic (O)vary (S)yndrome: the iHIT-PCOS randomised control trial. <https://www.cochranelibrary.com/central/doi/10.1002/central/CN-01842636/full> (accessed 20 Sept.).
- S35. Yu, L.; Liao, Y.; Wu, H.; Zhao, J.; Wu, L.; Shi, Y.; Fang, J., Effects of electroacupuncture and Chinese kidney-nourishing medicine on polycystic ovary syndrome in obese patients. *J Tradit Chin Med* **2013**, *33* (3), 287-93.
- S36. Zello, G. R., K. Rooke, J. J. Serrao, S. Chizen, D. R. Chilibeck, P. D., A pulse-based diet intervention in women with polycystic ovarian syndrome (PCOS): Compliance, and effects on body composition, fertility and metabolic measures. *FASEB J.* **2013**, *27*.
- S37. Thomson, R. L. S., S. Brinkworth, G. D. Noakes, M. Buckley, J. D., Seasonal effects on vitamin D status influence outcomes of lifestyle intervention in overweight and obese women with polycystic ovary syndrome. *Fertil. Steril.* **2013**, *99* (6), 1779-1785.
- S38. Jakubowicz, D. D., Y. B. Wainstein, J., The influence of meal timing on glucose metabolism and hyperandrogenism in lean women with polycystic ovary syndrome. *Diabetes* **2013**, *62*, A399.
- S39. Zheng, Y. H.; Wang, X. H.; Lai, M. H.; Yao, H.; Liu, H.; Ma, H. X., Effectiveness of abdominal acupuncture for patients with obesity-type polycystic ovary syndrome: a randomized controlled trial. *J Altern Complement Med* **2013**, *19* (9), 740-745.
- S40. Nybacka, Å.; Carlström, K.; Fabri, F.; Hellström, P. M.; Hirschberg, A. L., Serum antimüllerian hormone in response to dietary management and/or physical exercise in overweight/obese women with polycystic ovary syndrome: secondary analysis of a randomized controlled trial. *Fertil. Steril.* **2013**, *100* (4), 1096-1102.
- S41. Thomson, R. L. B., G. D. Noakes, M. Clifton, P. M. Norman, R. J. Buckley, J. D., The effect of diet and exercise on markers of endothelial function in overweight and obese women with polycystic ovary syndrome. *Hum. Reprod.* **2012**, *27* (7), 2169-2176.
- S42. Nyback, A.; Fabri, F.; Hellstrom, P. M.; Hirschberg, A. L.; Stahle, A., Plasma Anti-Mullerian Hormone (AMH) levels correlate and predict the response to lifestyle intervention in polycystic ovarian syndrome. *Clinical nutrition, supplement* **2012**, *7* (1), 255.
- S43. Li, D., The effect of acupuncture on ovulatory frequency and pituitary gonadotropin hormones in women with polycystic ovarian syndrome. *Focus Altern Complement Ther* **2012**, *17* (2), 121-122.

- S44. Le Donne, M. A.; A. Giarrusso, R. Lo Monaco, I. Muraca, U., Diet, metformin and inositol in overweight and obese women with polycystic ovary syndrome: Effects on body composition. *Minerva Ginecol* **2012**, *64* (1), 23-29.
- S45. Nyback, A. F.; F. Hellström, P. M. Hirschberg, A. L. Sta<sup>o</sup>hle, A., Plasma Anti-Müllerian Hormone (AMH) levels correlate and predict the response to lifestyle intervention in polycystic ovarian syndrome. *Clinical Nutrition, Supplement* **2012**, *7* (1), 255.
- S46. Mehrabani, H. H.; Salehpour, S.; Amiri, Z.; Farahani, S. J.; Meyer, B. J.; Tahbaz, F., Beneficial effects of a high-protein, low-glycemic-load hypocaloric diet in overweight and obese women with polycystic ovary syndrome: a randomized controlled intervention study. *J Am Coll Nutr* **2012**, *31* (2), 117-125.
- S47. Nybacka, A. C.; K. Stahle, A. Nyren, S. Hellstrom, P. M. Hirschberg, A. L., Randomized comparison of the influence of dietary management and/or physical exercise on ovarian function and metabolic parameters in overweight women with polycystic ovary syndrome. *Fertil. Steril.* **2011**, *96* (6), 1508-1513.
- S48. Moran, L. J.; Harrison, C. L.; Hutchison, S. K.; Stepto, N. K.; Strauss, B. J.; Teede, H. J., Exercise decreases anti-mullerian hormone in anovulatory overweight women with polycystic ovary syndrome: a pilot study. *Horm. Metab. Res.* **2011**, *43* (13), 977-9.
- S49. Redman, L. M. E.-H.; K. Ravussin, E., Aerobic exercise in women with polycystic ovary syndrome improves ovarian morphology independent of changes in body composition. *Fertil. Steril.* **2011**, *95* (8), 2696-2699.
- S50. Moran, L. J.; Noakes, M.; Clifton, P. M.; Norman, R. J., The effect of modifying dietary protein and carbohydrate in weight loss on arterial compliance and postprandial lipidemia in overweight women with polycystic ovary syndrome. *Fertil. Steril.* **2010**, *94* (6), 2451-4.
- S51. Fux Otta, C.; Wior, M.; Iraci, G. S.; Kaplan, R.; Torres, D.; Gaido, M. I.; Wyse, E. P., Clinical, metabolic, and endocrine parameters in response to metformin and lifestyle intervention in women with polycystic ovary syndrome: a randomized, double-blind, and placebo control trial. *Gynecol. Endocrinol.* **2010**, *26* (3), 173-178.
- S52. Thomson, R. L.; Buckley, J. D.; Moran, L. J.; Noakes, M.; Clifton, P. M.; Norman, R. J.; Brinkworth, G. D., The effect of weight loss on anti-Mullerian hormone levels in overweight and obese women with polycystic ovary syndrome and reproductive impairment. *Hum. Reprod.* **2009**, *24* (8), 1976-81.
- S53. Moro, C.; Pasarica, M.; Elkind-Hirsch, K.; Redman, L. M., Aerobic exercise training improves atrial natriuretic peptide and catecholamine-mediated lipolysis in obese women with polycystic ovary syndrome. *J. Clin. Endocrinol. Metab.* **2009**, *94* (7), 2579-86.
- S54. Panidis, D.; Farmakiotis, D.; Rouso, D.; Kourtis, A.; Katsikis, I.; Krassas, G., Obesity, weight loss, and the polycystic ovary syndrome: effect of treatment with diet and orlistat for 24 weeks on insulin resistance and androgen levels. *Fertil. Steril.* **2008**, *89* (4), 899-906.
- S55. Thomson, R. L.; Buckley, J. D.; Noakes, M.; Clifton, P. M.; Norman, R. J.; Brinkworth, G. D., The effect of a hypocaloric diet with and without exercise training on body composition, cardiometabolic risk profile, and reproductive function in overweight and obese women with polycystic ovary syndrome. *J. Clin. Endocrinol. Metab.* **2008**, *93* (9), 3373-3380.
- S56. D Florakis, E. D.-K., I Katsikis, GP Nassis, A Karkanaki, N Georgopoulos and D Panidis Effect of Diet Plus Sibutramine on Hormonal and Metabolic Features in Overweight and Obese Women With PCOS. <https://www.cochranelibrary.com/central/doi/10.1002/central/CN-01514993/full> (accessed 20, Sept).
- S57. Bruner, B. C.; K. Chizen, D., Effects of exercise and nutritional counseling in women with polycystic ovary syndrome. *Appl Physiol Nutr Metab* **2006**, *31* (4), 384-391.
- S58. Gambineri, A. P.; L. De lasio, R. Cantelli, B. Cognini, G. E. Filicori, M. Barreca, A. Diamanti-Kandarakis, E. Pagotto, U. Pasquali, R., Efficacy of octreotide-LAR in dieting women with abdominal obesity and polycystic ovary syndrome. *J. Clin. Endocrinol. Metab.* **2005**, *90* (7), 3854-3862.
- S59. Gambineri, A. P.; C. Genghini, S. Morselli-Labate, A. M. Cacciari, M. Pagotto, U. Pasquali, R., Effect of flutamide and metformin administered alone or in combination in dieting obese women with polycystic ovary syndrome. *Clin. Endocrinol.* **2004**, *60* (2), 241-249.
- S60. Vanky, E.; Salvesen, K.; Carlsen, S. J. H. R., Six-month treatment with low-dose dexamethasone further reduces androgen levels in PCOS women treated with diet and lifestyle advice, and metformin. *Hum. Reprod.* **2004**, *19* (3), 529-533.
- S61. Stamets, K.; Taylor, D. S.; Kunselman, A.; Demers, L. M.; Pelkman, C. L.; Legro, R. S., A randomized trial of the effects of two types of short-term hypocaloric diets on weight loss in women with polycystic ovary syndrome. *Fertil. Steril.* **2004**, *81* (3), 630-637.
- S62. Hoeger, K. M.; Kochman, L.; Wixom, N.; Craig, K.; Miller, R. K.; Guzick, D. S., A randomized, 48-week, placebo-controlled trial of intensive lifestyle modification and/or metformin therapy in overweight women with polycystic ovary syndrome: a pilot study. *Fertil. Steril.* **2004**, *82* (2), 421-429.

- S63. Gambineri, A. P.; U. Tschöp, M. Vicennati, V. Manicardi, E. Carcello, A. Cacciari, M. De Iasio, R. Pasquali, R., Anti-androgen treatment increases circulating ghrelin levels in obese women with polycystic ovary syndrome. *J. Endocrinol. Invest.* **2003**, *26* (7), 629-634.
- S64. Moran, L. J.; Noakes, M.; Clifton, P. M.; Tomlinson, L.; Galletly, C.; Norman, R. J., Dietary composition in restoring reproductive and metabolic physiology in overweight women with polycystic ovary syndrome. *J. Clin. Endocrinol. Metab.* **2003**, *88* (2), 812-819.
- S65. Pasquali, R.; Gambineri, A.; Biscotti, D.; Vicennati, V.; Gagliardi, L.; Colitta, D.; Fiorini, S.; Cognigni, G. E.; Filicori, M.; Morselli-Labate, A. M., Effect of long-term treatment with metformin added to hypocaloric diet on body composition, fat distribution, and androgen and insulin levels in abdominally obese women with and without the polycystic ovary syndrome. *J. Clin. Endocrinol. Metab.* **2000**, *85* (8), 2767-74.
- S66. Crave, J. C.; Fimbel, S.; Lejeune, H.; Cugnardey, N.; Déchaud, H.; Pugeat, M., Effects of diet and metformin administration on sex hormone-binding globulin, androgens, and insulin in hirsute and obese women. *J. Clin. Endocrinol. Metab.* **1995**, *80* (7), 2057-2062.
- S67. Guzick, D. S.; Wing, R.; Smith, D.; Berga, S. L.; Winters, S. J., Endocrine consequences of weight loss in obese, hyperandrogenic, anovulatory women. *Fertil. Steril.* **1994**, *61* (4), 598-604.
- S68. Pasquali, R. F., R. Venturoli, S., Effect of weight loss and antiandrogenic therapy on sex hormone blood levels and insulin resistance in obese patients with polycystic ovaries. *Am. J. Obstet. Gynecol.* **1986**, *154* (1), 139-144.
- S69. Smith, C. A. D. L., S. Chapman, M. Ratcliffe, J. Norman, R. J. Johnson, N. P. Boothroyd, C. Fahey, P., Effect of acupuncture vs sham acupuncture on live births among women undergoing in vitro fertilization: A randomized clinical trial. *Obstet Gynecol Surv* **2018**, *73* (8), 466-467.
- S70. Li, J. W., Q. Wu, X. K. Zhou, Z. M. Fu, P. Chen, X. H. Yan, Y. Wang, X. Yang, Z. W. Li, W. L. Stener-Victorin, E. Legro, R. S. Ng, E. H. Y. Zhang, H. Mol, B. W. J. Wang, C. C., Effect of exposure to second-hand smoke from husbands on biochemical hyperandrogenism, metabolic syndrome and conception rates in women with polycystic ovary syndrome undergoing ovulation induction. *Hum. Reprod.* **2018**, *33* (4), 617-625.
- S71. Wu, X. K.; Stener-Victorin, E.; Kuang, H. Y.; Ma, H. L.; Gao, J. S.; Xie, L. Z.; Hou, L. H.; Hu, Z. X.; Shao, X. G.; Ge, J.; et al., Effect of acupuncture and clomiphene in Chinese women with polycystic ovary syndrome: a randomized clinical trial. *JAMA - journal of the american medical association* **2017**, *317* (24), 2502-2514.
- S72. Radin, R. M., S. L. Silver, R. M. Lynch, A. M. Perkins, N. Sjaarda, L. Schisterman, E., Recent weight-control efforts before trying to conceive, fecundability, and ovulation among fecund women. *Fertil. Steril.* **2016**, *106*, e102.
- S73. Gillerman, K.; Rehman, N.; Dilgil, M.; Homburg, R. In *The impact of acupuncture on IVF success rates: a randomized controlled trial*, 32nd Annual Meeting of the European Society of Human Reproduction and Embryology, Helsinki, Finland, July, 2016; Hum. Reprod. : Helsinki, Finland, 2016; pp i89-.
- S74. Cochrane, S.; Smith, C. A.; Possamai-Inesedy, A.; Bensoussan, A., Prior to Conception: the Role of an Acupuncture Protocol in Improving Women's Reproductive Functioning Assessed by a Pilot Pragmatic Randomised Controlled Trial. *Evid Based Complement Alternat Med* **2016**, 2016.
- S75. Firouzabadi, R. D. A., A. Modarresi, S. Sekhavat, L. MohammadTaheri, S., Therapeutic effects of calcium & vitamin D supplementation in women with PCOS. *Complement Ther Clin Pract* **2012**, *18* (2), 85-88.
- S76. Rosety, M. Á. D., A. J. Rosety, J. M. Pery, M. T. Brenes-Martín, F. Bernardi, M. García, N. Rosety-Rodríguez, M. Ordoñez, F. J. Rosety, I., Exercise improved semen quality and reproductive hormone levels in sedentary obese adults. *Nutricion hospitalaria* **2017**, *34* (3), 603-607.
- S77. Maleki, B. H.; Tartibian, B., High-Intensity Exercise Training for Improving Reproductive Function in Infertile Patients: a Randomized Controlled Trial. *Journal of obstetrics and gynaecology canada* **2017**, *39* (7), 545-558.
- S78. Fontenot, G. K. T., J. Podolski, J. In *Diet and exercise results in an increased testosterone, while addition of enclomiphene citrate significantly increases free-testosterone and improves lean body mass*, 99th Annual Meeting of the Endocrine Society (ENDO 2017), United States, Orlando, FL, April, 2017; Endocr. Rev.: United States, Orlando, FL, 2017.
- S79. Rafiee, B. M., M. H. Rahimi-Ghalati, N., Comparing the Effectiveness of Dietary Vitamin C and Exercise Interventions on Fertility Parameters in Normal Obese Men. *Urol J* **2016**, *13* (2), 2635-2639.
80. Collins, C. E.; Jensen, M. E.; Young, M. D.; Callister, R.; Plotnikoff, R. C.; Morgan, P. J., Improvement in erectile function following weight loss in obese men: the SHED-IT randomized controlled trial. *Obes Res Clin Pract* **2013**, *7* (6), e450-4.
- S81. Machlitt, A. R.; Steinheim, E.; Pfueller, B. F., Effects of metformin plus lifestyle modification on menstrual cycle and body mass index are not influenced by insulin resistance: a 16 week, double-blind, controlled, randomised study in PCOS. *Fertil. Steril.* **2007**, *88* Suppl 1, 15-16, Abstract no: 41.

82. Steegers-Theunissen, R. P. M. In *Preconceptional personalised mHealth lifestyle coaching: First results of a randomized controlled trial in couples undergoing IVF/ICSI treatment*, the 34rd Annual Meeting of the European Society of Human Reproduction and Embryology, Barcelona, Spain, July, 2018; Hum. Reprod.: Barcelona, Spain, 2018; pp i74-i75.
- S83. Deng, Y.; Xie, L.; Wu, X. K.; Ng, E. H.; Victorin, E. S.; Zhang, H.; Legro, R. S.; Mol, B. W. In *Prediction models for ovulation, conception, pregnancy and live birth in infertile women with polycystic ovary syndrome*, 33rd Annual Meeting of the European Society of Human Reproduction and Embryology, Geneva, Switzerland, July, 2017; Hum. Reprod.: Geneva, Switzerland, 2017; pp i454-i455.
- S84. Kaya, Y.; Kizilkaya Beji, N.; Aydin, Y.; Hassa, H., The effect of health-promoting lifestyle education on the treatment of unexplained female infertility. *Eur. J. Obstet. Gynecol. Reprod. Biol.* **2016**, *207*, 109-114.
- S85. Moore, A. K. R., R. Sandberg, J. Holt-Lunstad, J. Carrell, D. T. Straseski, J. Peterson, C. M. Johnstone, E. B. In *Intensive lifestyle intervention including emotionally-focused couples therapy leads to more pregnancies and weight loss in obese infertile couples*, ASRM Scientific Congress and Expo Scaling New Heights in Reproductive Medicine (ASRM 2016), Salt Lake City, UT, United States, , Oct. 2016; Fertil. Steril.: Salt Lake City, UT, United States, , 2016; p e101.
- S86. Swaroop, A.; Jaipuria, A. S.; Gupta, S. K.; Bagchi, M.; Kumar, P.; Preuss, H. G.; Bagchi, D., Efficacy of a Novel Fenugreek Seed Extract (*Trigonella foenum-graecum*, Furocyst) in Polycystic Ovary Syndrome (PCOS). *Int J Med Sci* **2015**, *12* (10), 825-831.
- S87. Polotsky, A. J.; Allshouse, A. A.; Krawetz, S.; Santoro, N.; Eisenberg, E.; Zhang, H.; Diamond, M. P. In *Male obesity is an independent risk factor for treatment failure among couples with unexplained infertility in the assessment of multiple intrauterine gestations from ovarian stimulation (AMIGOS) trial*, 71st Annual Meeting of the American Society for Reproductive Medicine ( ASRM 2015 ), Baltimore, MD United States., Oct. 2015 Fertil. Steril.: Baltimore, MD United States., 2015; p e78.
- S88. Miller, P. B.; Forstein, D. A.; Styles, S., Effect of short-term diet and exercise on hormone levels and menses in obese, infertile women. *J Reprod Med* **2008**, *53* (5), 315-9.
- S89. Palomba, S. G., F. Falbo, A. Russo, T. Oppedisano, R. Tolino, A. Colao, A. Vigorito, C. Zullo, F. Orto, F., Structured exercise training programme versus hypocaloric hyperproteic diet in obese polycystic ovary syndrome patients with anovulatory infertility: A 24-week pilot study. *Hum. Reprod.* **2008**, *23* (3), 642-650.
- S90. Tsagareli, V.; Noakes, M.; Norman, R. J., Effect of a very-low-calorie diet on in vitro fertilization outcomes. *Fertil. Steril.* **2006**, *86* (1), 227-9.
- S91. Crosignani, P. G. C., M. Vegetti, W. Somigliana, E. Gessati, A. Ragni, G., Overweight and obese anovulatory patients with polycystic ovaries: Parallel improvements in anthropometric indices, ovarian physiology and fertility rate induced by diet. *Hum. Reprod.* **2003**, *18* (9), 1928-1932.
- S92. Stener-Victorin, E. W., U. Tägnfors, U. Lundberg, T. Lindstedt, G. Janson, P. O., Effects of electro-acupuncture on anovulation in women with polycystic ovary syndrome. *Acta Obstet Gynecol Scand* **2000**, *79* (3), 180-188.
- S93. Clark, A. M. T., B. Tomlinson, L. Galletly, C. Norman, R. J., Weight loss in obese infertile women results in improvement in reproductive outcome for all forms of fertility treatment. *Hum. Reprod.* **1998**, *13* (6), 1502-1505.
- S94. Galletly, C.; Clark, A.; Tomlinson, L.; Blaney, F., A group program for obese, infertile women: weight loss and improved psychological health. *J Psychosom Obstet Gynaecol* **1996**, *17* (2), 125-8.
- S95. Hollmann, M. R., B. Gerhard, I., Effects of weight loss on the hormonal profile in obese, infertile women. *Hum. Reprod.* **1996**, *11* (9), 1884-1891.
- S96. Clark, A. M. L., W. Galletly, C. Tomlinson, L. Blaney, F. Wang, X. Norman, R. J., Weight loss results in significant improvement in pregnancy and ovulation rates in anovulatory obese women. *Hum. Reprod.* **1995**, *10* (10), 2705-2712.
- S97. Munir, S. S.; Jabeen, S.; Alvi, N.; Khan, D.; Younis, B. B.; Khan, M., Role of orlistat combined with life style in the management of obese patients with polycystic ovarian syndrome. *PJMHS* **2018**, *12* (2), 477-480.
- S98. Den Harink, T. G., R. B. J. B. Hoek, A. Groen, H. Blom, N. A. Roseboom, T. J. Van Deutekom, A. W. In *Preconception lifestyle intervention in obese women improves echocardiographic indices of cardiovascular function in their offspring: Follow up of a randomised controlled trial*, 53rd Annual Meeting of the Association for European Paediatric and Congenital Cardiology (AEPC) Seville, Spain, May 15-18, 2019; Cardiol Young: Seville, Spain, 2019; pp S11-S12.
- S99. Van Elten, T. M.; Karsten, M. D. A.; Geelen, A.; Gemke, R.; Groen, H.; Hoek, A.; Van Poppel, M. N. M.; Roseboom, T. J., Preconception lifestyle intervention reduces long term energy intake in women with obesity and infertility: a randomised controlled trial *Int J Behav Nutr Phys Act* **2019**, *16* (1).
- S100. Wekker, V.; Karsten, M. D. A.; Painter, R. C.; Van De Beek, C.; Groen, H.; Mol, B. W. J.; Hoek, A.; Laan, E.; Roseboom, T. J., Sexual function in obese infertile women 5-6 years after a preconception lifestyle intervention. *Int J Gynaecol Obstet* **2018**, *143*, 402-.

- S101. van Elten, T. M.; Karsten, M. D. A.; Geelen, A.; van Oers, A. M.; van Poppel, M. N. M.; Groen, H.; Gemke, R.; Mol, B. W.; Mutsaerts, M. A. Q.; Roseboom, T. J.; et al., Effects of a preconception lifestyle intervention in obese infertile women on diet and physical activity; A secondary analysis of a randomized controlled trial. *PLoS ONE* **2018**, *13* (11), e0206888.
- S102. Einarsson, S.; Christina, B.; Kluge, L.; Thurin-Kjellberg, A. In *The effect of weight intervention on obstetric and neonatal outcome in obese women scheduled for IVF treatment*, the 34rd Annual Meeting of the European Society of Human Reproduction and Embryology, July, 2018; Hum. Reprod.: 2018; pp i319-i320.
- S103. Wekker, V.; Van Dammen, L.; Van Oers, A. M.; Mutsaerts, M. A. Q.; Painter, R. C.; Zwinderman, A. H.; Groen, H.; Van De Beek, C.; Kobold, A. C. M.; Land, J. A.; et al. In *Effect of a lifestyle intervention in obese infertile women on cardiometabolic health and quality of life: results of a randomised controlled trial*, 33rd Annual Meeting of the European Society of Human Reproduction and Embryology, Geneva, Switzerland, July, 2017; Hum. Reprod.: Geneva, Switzerland, 2017; pp i28-i29.
- S104. Dammen, L. W., V.; Oers, A.; Mutsaerts, M.; Painter, R.; Zwinderman, A. G., H.; Beek, C.; Kobold, A.; Land, J.; Kuchenbecker, W. G., R.; Oosterhuis, G.; Vogel, N.; Mol, B.; Roseboom, T.; Group, A. In *Effect of a lifestyle intervention in obese infertile women on cardiometabolic health and quality of life*, 24th European Congress of the European Congress on Obesity (ECO2017), Porto, Portugal, May. 2017; Obes Facts: Porto, Portugal, 2017; pp p 3-4.
- S105. Arentz, S.; Smith, C.; Abbott, J.; Fahey, P.; Cheema, B.; Bensoussan, A. In *Randomized controlled trial of combined lifestyle and herbal medicine in women with polycystic ovary syndrome*, 33rd Annual Meeting of the European Society of Human Reproduction and Embryology, Geneva, Switzerland, July, 2017; Hum. Reprod.: Geneva, Switzerland, 2017; pp i31-i32.
- S106. Van Oers, A. G., H. Mutsaerts, M. Burggraaff, J. Kuchenbecker, W. Perquin, D. Koks, C. Van Golde, R. Kaaijk, E. Schierbeek, J. Verberg, M. Broekmans, F. Mol, B. W. Land, J. Hoek, A. In *Is there a different effect of lifestyle intervention in subgroups of infertile obese women? Prespecified subgroup analyses of the LIFEstyle randomised controlled trial*, the 32nd Annual Meeting of the European Society of Human Reproduction and Embryology, Helsinki, Finland, July, 2016; Hum. Reprod.: Helsinki, Finland, 2016; p i29.
- S107. Legro, R. S.; Dodson, W. C.; Kunselman, A. R.; Stetter, C. M.; Kris-Etherton, P. M.; Williams, N. I.; Gnatuk, C. L.; Estes, S. J.; Allison, K. C.; Sarwer, D. B.; et al., Benefit of Delayed Fertility Therapy With Preconception Weight Loss Over Immediate Therapy in Obese Women With PCOS. *J. Clin. Endocrinol. Metab.* **2016**, *101* (7), 2658-2666.
- S108. Legro, R. S. D., W. C. Kris-Etherton, P. M. Kunselman, A. R. Stetter, C. M. Williams, N. I. Gnatuk, C. L. Estes, S. J. Fleming, J. Allison, K. C. Sarwer, D. B. Coutifaris, C. Dokras, A., Randomized Controlled Trial of Preconception Interventions in Infertile Women With Polycystic Ovary Syndrome. *J. Clin. Endocrinol. Metab.* **2015**, *100* (11), 4048-4058.
- S109. Duval, K.; Belan, M.; Jean-Denis, F.; Carranza-Mamane, B.; Pesant, M.-H.; Langlois, M.-F.; Hivert, M.-F.; Lavoie, H. B.; Baillargeon, J.-P., An Interdisciplinary Lifestyle Intervention Improves Clinically Relevant Fertility Outcomes in Obese Infertile Women – Preliminary Results of a Randomized Controlled Trial. *Can J Diabetes* **2015**, *39* (6), 532-533.
- S110. Belan, M.; Duval, K.; Jean-Denis, F.; Pesant, M. H.; Langlois, M. F.; Ainmelk, Y.; Carranza-Mamane, B.; Baillargeon, J. P. In *Impacts of lifestyle and anthropometric changes in male partners of obese infertile women on couples' fertility-preliminary results from a cohort study*, 97th Annual Meeting and Expo of the Endocrine Society, (ENDO 2015), San Diego, CA, United States., March, 2015; Endocr. Rev.: San Diego, CA, United States., 2015.
- S111. Van Oers, A. M.; Mutsaerts, M. A. Q.; Burggraaff, J. M.; Kuchenbecker, W. K. H.; Perquin, D. A. M.; Koks, C. A. M.; Van Golde, R.; Kaaijk, E. M.; Schierbeek, J. M.; Oosterhuis, G. J. E.; et al. In *Cost-effectiveness of a structured lifestyle program in overweight and obese subfertile women. Preliminary data from a randomised controlled trial-the LIFEstyle study*, 30th ESHRE Annual Meeting, Munich, Germany, July, 2014; Hum. Reprod.: Munich, Germany, 2014; pp i354-i355.
- S112. Mutsaerts, M. A. Q.; Van Oers, A. M.; Groen, H.; Burggraaff, J. M.; Kuchenbecker, W. K. H.; Perquin, D. A. M.; Koks, C. A. M.; Van Golde, R.; Kaaijk, E. M.; Schierbeek, J. M.; et al. In *The effectiveness of a structured lifestyle program in overweight and obese subfertile women. Preliminary data from a randomised controlled trial (LIFEstyle study)*, 30th ESHRE Annual Meeting, Munich, Germany, July, 2014; Hum. Reprod.: Munich, Germany, 2014; pp i75-i76.
- S113. Legro, R. S.; Dodson, W. C.; Kunselman, A. R.; Kris-Etherton, P. M.; Allison, K. C.; Sarwer, D. B.; Dokras, A.; Coutifaris, C. In *Effects of preconception intervention on the PCOS phenotype, ovulation, and live birth rates: a multicenter, multi-phase RCT*, 70th Annual Meeting of the American Society for Reproductive Medicine, Honolulu, Hawaii, October 2014; Fertil. Steril.: Honolulu, Hawaii, 2014; p e2.

- S114. Sim, K. A. D., G. M. Denyer, G. S. Caterson, I. D. In *Substantial cost savings of a weight-loss programme in obese women undergoing fertility treatment*, 20th European Congress on Obesity, ECO 2013, Liverpool, United Kingdom, May, 2013; Obes Facts: Liverpool, United Kingdom, 2013; p 46.
- S115. Jakubowicz, D. B., M. Wainstein, J. Froy, O. In *Influence of meal timing on glucose metabolism, ovarian cytochrome P450C17 $\alpha$  activity and serum free testosterone in lean women with polycystic ovary syndrome*, 95th Annual Meeting and Expo of the Endocrine Society, (ENDO 2013), San Francisco, CA, United States, June, 2013; Endocr. Rev.: San Francisco, CA, United States, 2013.
- S116. J., E.-G. J. Effect of Hypocaloric Diet and Exercise in Obese Women Who Are Subjected to IVF Cycle. <https://www.cochranelibrary.com/central/doi/10.1002/central/CN-01490368/full> (accessed 20.Sept.).
- S117. Sim, K. D., G. Caterson, I., Weight loss improves reproductive outcomes for obese women undergoing assisted reproductive technology. *Obesity Facts* **2012**, 5 (suppl 1), 36.
- S118. A.T., K. Weight Management Intervention for Obese Women and the Live Birth Outcome of in Vitro Fertilization (IVF). <https://www.cochranelibrary.com/central/doi/10.1002/central/CN-01536498/full> (accessed 20.Sept.).
- S119. Ma, H., Zheng, Y.H. Evaluate the efficacy of abdominal acupuncture as a treatment for Obesity-type Polycystic Ovarian Syndrome Patients: a randomized controlled trial. <https://www.cochranelibrary.com/central/doi/10.1002/central/CN-01832945/full> (accessed 20 Sept.).
- S120. Palomba, S.; Falbo, A.; Giallauria, F.; Russo, T.; Rocca, M.; Tolino, A.; Zullo, F.; Orio, F., Six weeks of structured exercise training and hypocaloric diet increases the probability of ovulation after clomiphene citrate in overweight and obese patients with polycystic ovary syndrome: a randomized controlled trial. *Hum. Reprod.* **2010**, 25 (11), 2783-2791.
- S121. Yin, Y.; Zhang, Y.; Zhang, H.; Jiang, D.; Guo, G., Clinical therapeutic effects of acupuncture combined with Chinese herbal medicine on infertility of polycystic ovary syndrome in the patients with ovulation induction with letrozole. *Zhongguo zhen jiu* **2018**, 38 (1), 27-32.
- S122. Shen, L. Y.; Liang, C. M.; Yang, W. J.; Pan, L.; Li, H.; Hu, H., Acupuncture Treatment of Polycystic Ovarian Syndrome Patients with Abdominal Obesity by Regulating Dai Meridian: a Randomized Controlled Clinical Trial. *Zhen Ci Yan Jiu* **2018**, 43 (4), 255-259.
- S123. Cao, Y.; Zhang, L.; Zhao, D.; Liu, Z., DONG's extraordinary acupoints for the ovarian function of polycystic ovary syndrome: a randomized controlled pilot trial. *Zhongguo Zhen Jiu* **2017**, 37 (7), 710-714.
- S124. Nasrekani, Z. A.; Fathi, M., Efficacy of 12 weeks aerobic training on body composition, aerobic power and some women-hormones in polycystic ovary syndrome infertile women. *Iranian journal of obstetrics, gynecology and infertility* **2016**, 19 (5), 1-10.
- S125. Lai, M. H. M., H. X. Yao, H. Liu, H. Song, X. H. Huang, W. Y. Wu, X. K., Effect of abdominal acupuncture therapy on the endocrine and metabolism in obesity-type polycystic ovarian syndrome patients. *Zhen Ci Yan Jiu* **2010**, 35 (4), 298-302.
- S126. Hamayeli Mehrabani, H. T., F. Salehpour, S. Hedayati, M. Amiri, Z. Ghassemi, A., Reproductive hormonal changes following two types of hypocaloric diets in overweight and obese polycystic ovary syndrome women. *IJEM* **2010**, 12 (2), 160-168+200.
- S127. Esmailzadeh, S. G., L. Sharbatdaran, M. Bijani, A. Sajadi, P., Comparison of flutamide and metformin in overweight-obese women with polycystic ovary syndrome following a hypocaloric dieting. *JBUMS* **2010**, 12 (4), 7-13.
- S128. J.P., B. Fit-for-Fertility Multicenter Randomized Controlled Trial. <https://www.cochranelibrary.com/central/doi/10.1002/central/CN-01919678/full> (accessed Sep).
- S129. G., C. Multidisciplinary Treatment of Obesity Prior to in Vitro Fertilization: impact on Global Reproductive Outcomes (PRO-FIV Study). <https://www.cochranelibrary.com/central/doi/10.1002/central/CN-01559547/full> (accessed Sep.).
- S130. T., S. A trial to compare the effect of weight loss diets on obese women with polycystic ovarian syndrome (PCOS). <https://www.cochranelibrary.com/central/doi/10.1002/central/CN-01895098/full> (accessed Sep.).
- S131. Jiskoot, G.; Benneheij, S. H.; Beerthuizen, A.; De Niet, J. E.; De Klerk, C.; Timman, R.; Busschbach, J. J.; Laven, J. S. E., A three-component cognitive behavioural lifestyle program for preconceptional weight-loss in women with polycystic ovary syndrome (PCOS): a protocol for a randomized controlled trial. *Reprod Health* **2017**, 14 (34).
- S132. Duval, K.; Langlois, M.-F.; Carranza-Mamane, B.; Pesant, M.-H.; Hivert, M.-F.; Poder, T. G.; Lavoie, H. B.; Ainmelk, Y.; Tribble, D. S.-C.; Laredo, S. J. B. o., The Obesity-Fertility Protocol: a randomized controlled trial assessing clinical outcomes and costs of a transferable interdisciplinary lifestyle intervention, before and during pregnancy, in obese infertile women. *BMC obesity* **2015**, 2 (1), 47.



- S133. Santoro N., Z. H., Legro R., Diamond M., Cedars M., Steiner A., Hansen K., Coutifaris C. and Eisenberg E. Improving Reproductive Fitness Through Pretreatment With Lifestyle Modification in Obese Women With Unexplained Infertility. <https://www.cochranelibrary.com/central/doi/10.1002/central/CN-01506150/full> (accessed Sep).
- S134. Mutsaerts, M. A.; Groen, H.; ter Bogt, N. C.; Bolster, J. H.; Land, J. A.; Bemelmans, W. J.; Kuchenbecker, W. K.; Hompes, P. G.; Macklon, N. S.; Stolk, R. P.; et al., The LIFESTYLE study: costs and effects of a structured lifestyle program in overweight and obese subfertile women to reduce the need for fertility treatment and improve reproductive outcome. A randomised controlled trial. *BMC Womens Health* **2010**, *10*, 22.
- S135. van Elten, T. M.; Karsten, M. D. A.; Geelen, A.; Gemke, R. J. B. J.; Groen, H.; Hoek, A.; van Poppel, M. N. M.; Roseboom, T. J., Preconception lifestyle intervention reduces long term energy intake in women with obesity and infertility: a randomised controlled trial. *Int J Behav Nutr Phys Act* **2019**, *16* (1), N.PAG-N.PAG.
- S136. van Dammen, L.; Wekker, V.; de Rooij, S. R.; Mol, B. W. J.; Groen, H.; Hoek, A.; Roseboom, T. J., The effects of a pre-conception lifestyle intervention in women with obesity and infertility on perceived stress, mood symptoms, sleep and quality of life. *PLoS ONE* **2019**, *14* (2).
- S137. Einarsson, S.; Bergh, C.; Kluge, L.; Thurin-Kjellberg, A., No effect of weight intervention on perinatal outcomes in obese women scheduled for in vitro fertilization treatment. *Acta Obstet Gynecol Scand* **2019**.
- S138. van Elten, T. M. K., M. D. A. Geelen, A. van Oers, A. M. van Poppel, M. N. M. Groen, H. Gemke, Rbj Mol, B. Mutsaerts, M. A. Q. Roseboom, T. J. Hoek, A. L. IFestyle Study Grp, Effects of a preconception lifestyle intervention in obese infertile women on diet and physical activity; A secondary analysis of a randomized controlled trial. *PLoS ONE* **2018**, *13* (11), 15.
- S139. Wekker, V.; Karsten, M. D. A.; Painter, R. C.; van de Beek, C.; Groen, H.; Mol, B. W. J.; Hoek, A.; Laan, E.; Roseboom, T. J., A lifestyle intervention improves sexual function of women with obesity and infertility: a 5 year follow-up of a RCT. *PLoS ONE* **2018**, *13* (10), e0205934.
- S140. van Dammen, L.; Wekker, V.; Van Oers, A. M.; Mutsaerts, M. A. Q.; Painter, R. C.; Zwinderman, A. H.; Groen, H.; van de Beek, C.; Muller Kobold, A. C.; Kuchenbecker, W. K. H.; et al., Effect of a lifestyle intervention in obese infertile women on cardiometabolic health and quality of life: a randomized controlled trial. *PLoS ONE* **2018**, *13* (1) (no pagination).
- S141. Van Oers, A. M.; Mutsaerts, M. A. Q.; Burggraaff, J. M.; Kuchenbecker, W. K. H.; Perquin, D. A. M.; Koks, C. A. M.; Van Golde, R.; Kaaijk, E. M.; Schierbeek, J. M.; Klijn, N. F.; et al., Cost-effectiveness analysis of lifestyle intervention in obese infertile women. *Hum. Reprod.* **2017**, *32* (7), 1418-1426.
- S142. van Oers, A. M.; Groen, H.; Mutsaerts, M. A.; Burggraaff, J. M.; Kuchenbecker, W. K.; Perquin, D. A.; Koks, C. A.; van Golde, R.; Kaaijk, E. M.; Schierbeek, J. M.; et al., Effectiveness of lifestyle intervention in subgroups of obese infertile women: a subgroup analysis of a RCT. *Hum. Reprod.* **2016**, *31* (12), 2704-2713.
- S143. Moran, L. J.; Tsagareli, V.; Noakes, M.; Norman, R., Altered Preconception Fatty Acid Intake Is Associated with Improved Pregnancy Rates in Overweight and Obese Women Undertaking In Vitro Fertilisation. *Nutrients* **2016**, *8* (1).
- S144. Jiskoot, G.; Timman, R.; Beerthuizen, A.; Dietz de Loos, A.; van Busschbach, J.; Laven, J., Results Of A Lifestyle Intervention Involving Healthy Diet, Exercise and Cognitive Behavioral Therapy In Polycystic Ovary Syndrome (PCOS). *Am. J. Physiol. Endocrinol. Metab.* **2018**.
- S145. Belan, M.; Carranza-Mamane, B.; Ainmelk, Y.; Pesant, M.-H.; Duval, K.; Jean-Denis, F.; Langlois, M.-F.; Lavoie, H. B.; Waddell, G.; Baillargeon, J.-P. J. C. J. o. D., A Lifestyle Intervention Targeting Women With Obesity and Infertility Improves Their Fertility Outcomes, Especially in Women With PCOS: A Randomized Controlled Trial. *Can J Diabetes* **2019**, *43* (7), S2.
- S146. Belan, M.; Carranza-Mamane, B.; AinMelk, Y.; Pesant, M.-H.; Duval, K.; Jean-Denis, F.; Langlois, M.-F.; Lavoie, H.; Waddell, G.; Baillargeon, J.-P. J. F.; Sterility, A lifestyle intervention targeting women with obesity and infertility improves their fertility outcomes, especially in women with PCOS: a randomized controlled trial. *Fertil. Steril.* **2019**, *112* (3), e40.
- S147. Duval, K. B., M. Jean-Denis, F. Baillargeon, J. In *An interdisciplinary lifestyle intervention improves clinically relevant fertility outcomes in obese infertile women-preliminary results*, 71st Annual Meeting of the American Society for Reproductive Medicine, (ASRM 2015), Oct, 2015; Fertil. Steril.: 2015; p e97.

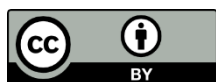

© 2020 by the authors. Submitted for possible open access publication under the terms and conditions of the Creative Commons Attribution (CC BY) license (<http://creativecommons.org/licenses/by/4.0/>).
